# Supplementary material
Source: publisher figshare collection journal article supplement (https://acs.figshare.com/ndownloader/files/15369104)
Supplement: Supplementary file 1 [file 15369104]

# **Impressive radiation stability of organic solar cells based on fullerene derivatives and carbazole-containing conjugated polymers**

*Ilya V. Martynov, <sup>†</sup> Alexander V. Akkuratov, <sup>†</sup> Sergey Yu. Luchkin, <sup>§</sup> Sergey A. Tsarev, <sup>§</sup> Sergei D. Babenko,<sup>‡</sup> Vladimir G. Petrov, <sup>‡</sup> Keith J. Stevenson <sup>§</sup> and Pavel A. Troshin \* <sup>§, †</sup>*

<sup>†</sup> The Institute for Problems of Chemical Physics of the Russian Academy of Sciences, Semenov Prospect 1, Chernogolovka Moscow region, 142432, Russia.

<sup>§</sup> Skolkovo Institute of Science and Technology, Nobel St. 3, Moscow, 143026, Russia.

<sup>‡</sup> The Institute for Energy Problems of Chemical Physics, Russian Academy of Sciences (Branch), Semenov Prospect 1/10, Chernogolovka, Moscow region, 142432, Russia

<sup>‡</sup> Lomonosov Moscow State University, GSP-1, Leninskie Gory, Moscow, 119991, Russian Federation.

\*Corresponding Author

Pavel A. Troshin e-mail: P.Troshin@skoltech.ru

## Table of Contents:

|                                                                                                                                                                                             |       |
|---------------------------------------------------------------------------------------------------------------------------------------------------------------------------------------------|-------|
| <b>Figure S1.</b> GPC profiles of the <b>P1</b> (a), <b>P2</b> (b) and [60]PCBM (c) before and after exposure to gamma rays with the absorbed radiation dose of 200 Gy.                     | S3    |
| <b>Figure S2.</b> ESR spectra of the <b>P1</b> (a), <b>P2</b> (b) and [60]PCBM (c) before and after exposure to gamma rays with the absorbed radiation dose of 200 Gy.                      | S4    |
| <b>Figure S3-5.</b> AFM topography, surface potential, phase and current mapping images of <b>P1</b> , <b>P2</b> and [60]PCBM films before and after exposure to gamma rays.                | S5-S6 |
| <b>Figure S6</b> EQE spectra of organic solar cells based on the blends of non-exposed and exposed to 200Gy materials: <b>P1</b> /[60]PCBM and <b>P2</b> /[60]PCBM.                         | S6    |
| <b>Figure S7</b> Evolution of the absorption and PL spectra of the films of <b>P1</b> /[60]PCBM, <b>P2</b> /[60]PCBM.                                                                       | S7    |
| <b>Figures S8-9:</b> AFM topography, surface potential, phase and current mapping images of <b>P1</b> /[60]PCBM and <b>P2</b> /[60]PCBM films before and after exposure to gamma rays       | S8    |
| <b>Figure S10.</b> $V_{oc}$ vs. light intensity dependences for organic solar cells based on the pristine and exposed to gamma rays <b>P1</b> /[60]PCBM and <b>P2</b> /[60]PCBM blend films | S9    |
| <b>Figure S11.</b> Transient photovoltage (TPV) profiles for organic solar cells based on the pristine and exposed to gamma rays <b>P1</b> /[60]PCBM and <b>P2</b> /[60]PCBM blend films    | S10   |
| <b>Figure S12.</b> Normalized characteristics of the solar cells based on <b>P1</b> /[60]PCBM and <b>P2</b> /[60]PCBM plotted as functions of the radiation dose.                           | S11   |
| <b>Table S1</b> Characteristics of organic solar cells before and after exposure of the samples to different doses of gamma rays                                                            | S12   |

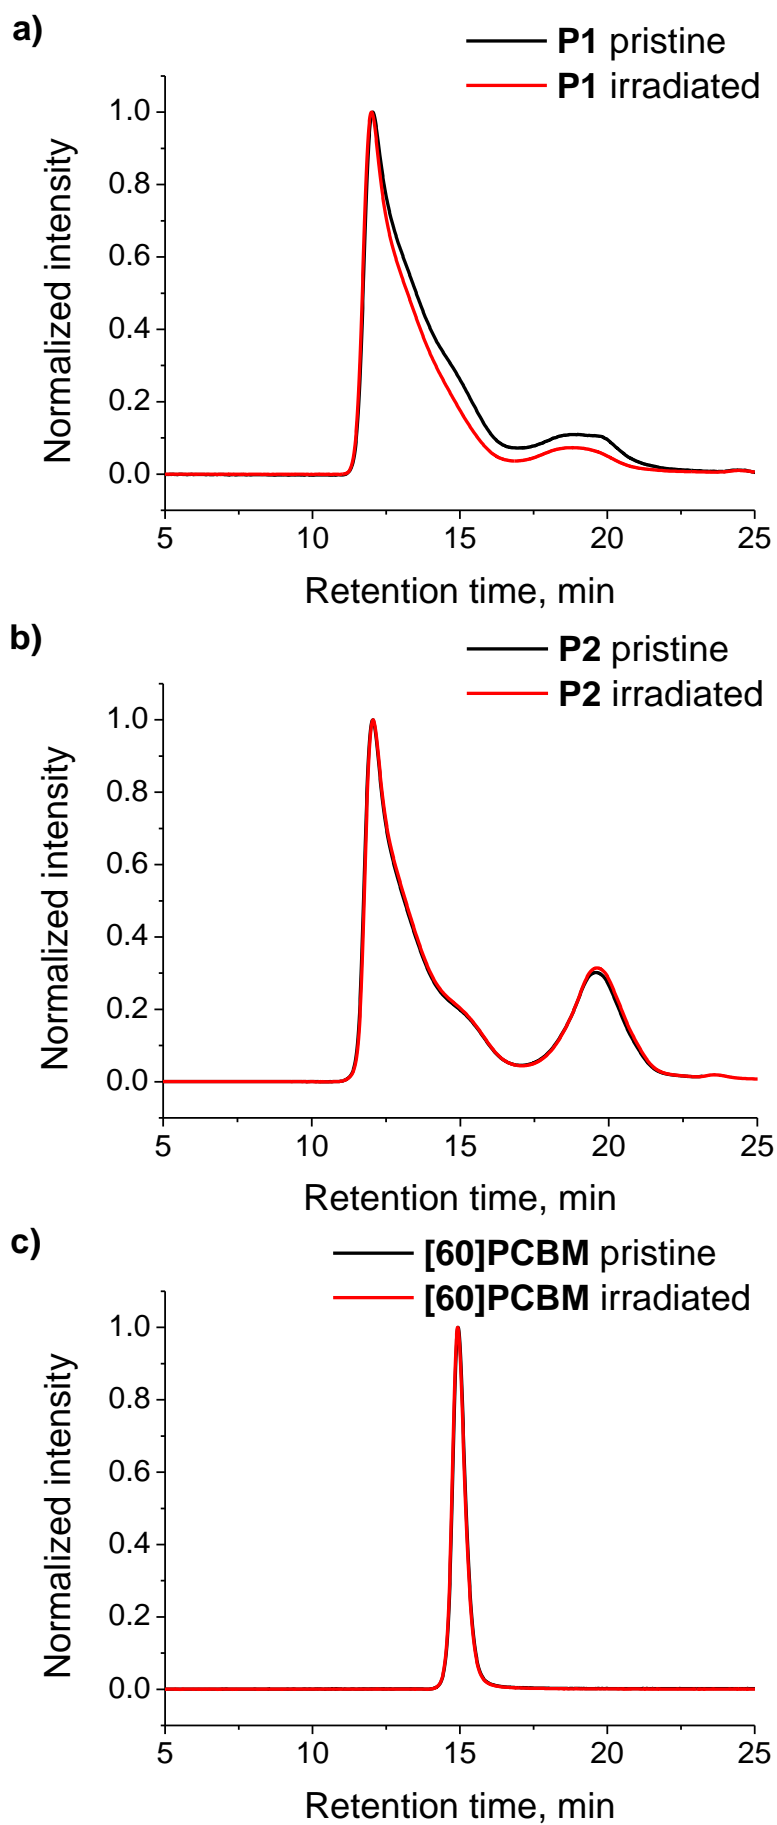

**Figure S1.** GPC profiles of the **P1** (a), **P2** (b) and **[60]PCBM** (c) before and after exposure to gamma rays with the absorbed radiation dose of 200 Gy.

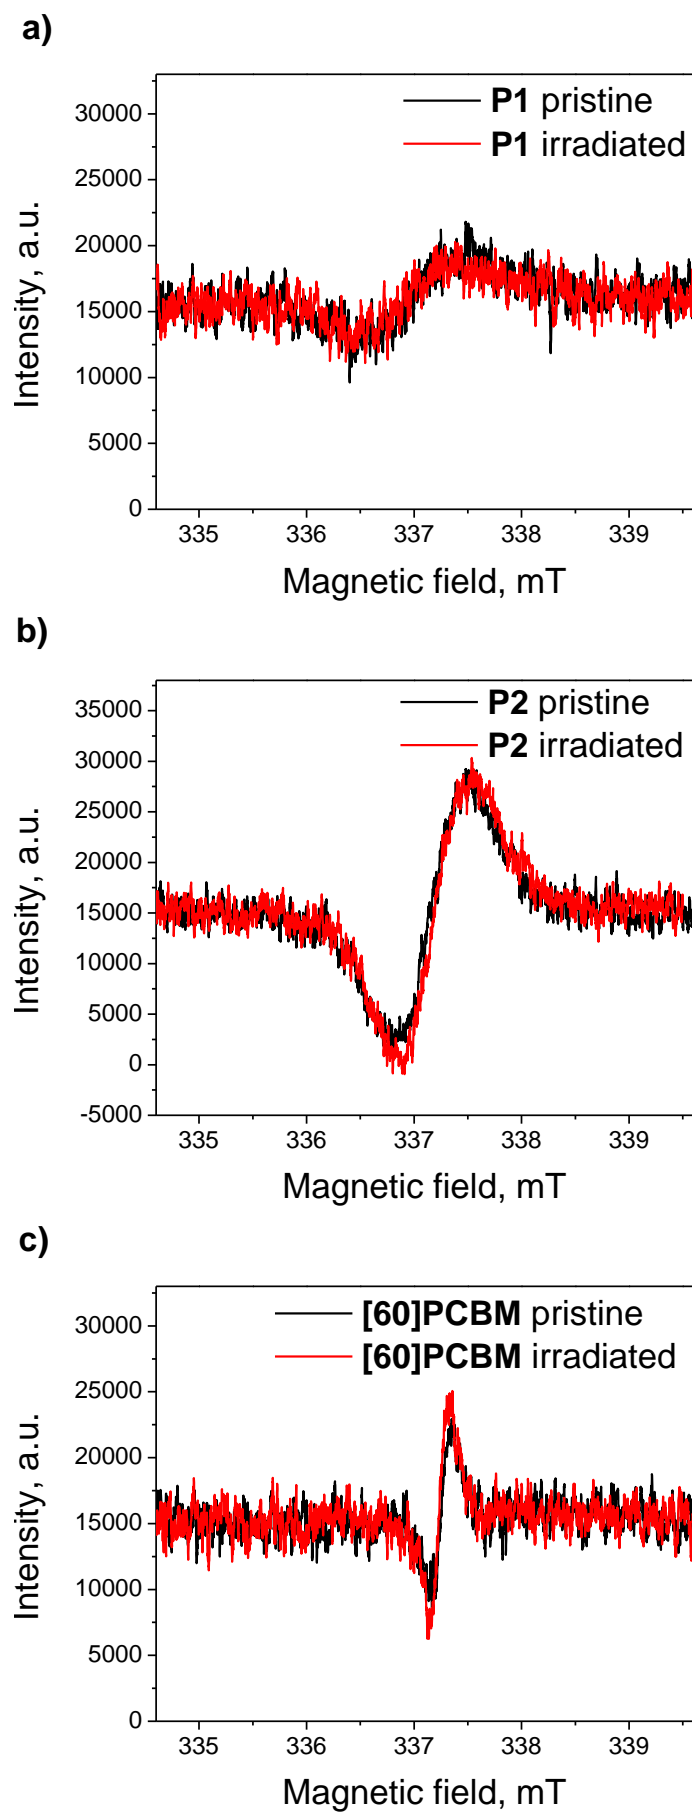

**Figure S2.** ESR spectra of the **P1** (a), **P2** (b) and [60]PCBM (c) before and after exposure to gamma rays with the absorbed radiation dose of 200 Gy.

### Pristine films

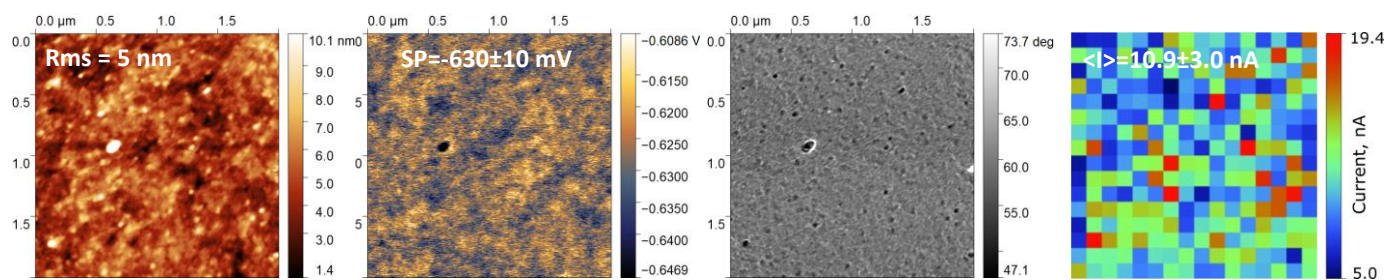

### Exposed films

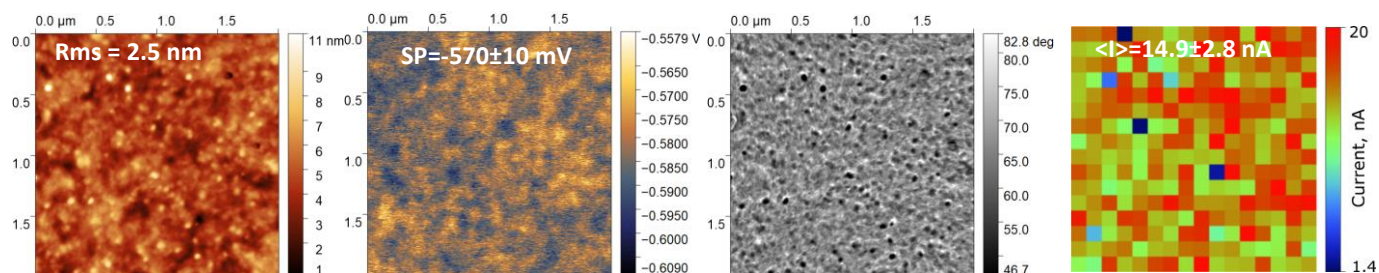

**Figure S3.** Left to right: AFM topography, surface potential, phase and current mapping images of **P1** films before (top) and after (bottom) exposure to gamma rays (6500 Gy).

### Pristine films

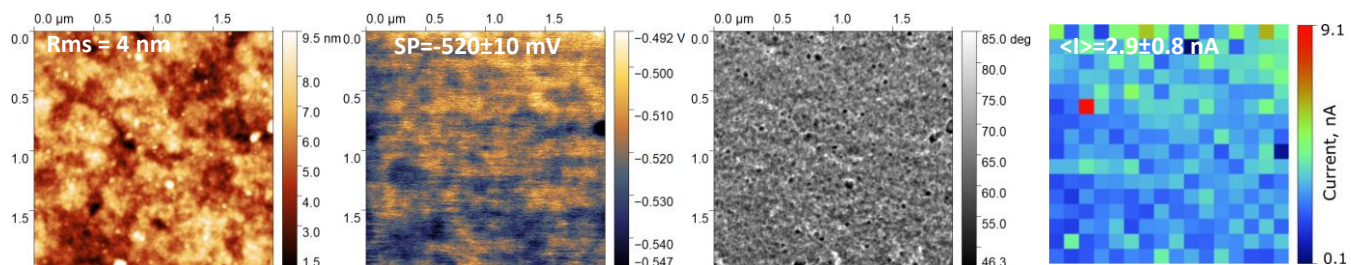

### Exposed films

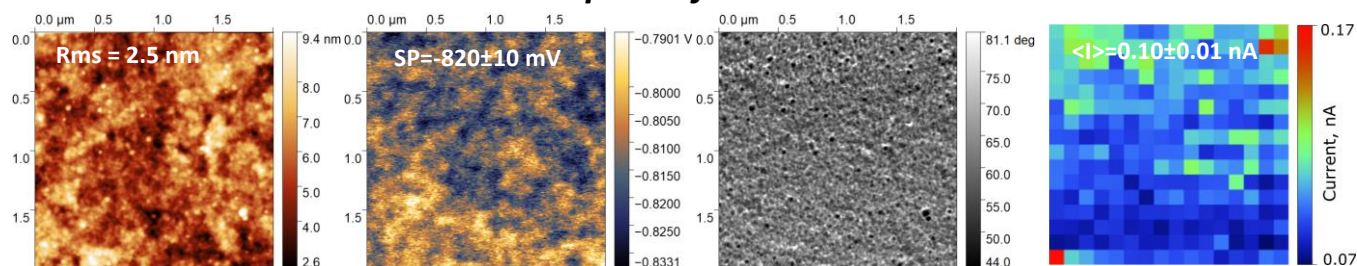

**Figure S4.** Left to right: AFM topography, surface potential, phase and current mapping images of **P2** films before (top) and after (bottom) exposure to gamma rays (500 Gy).

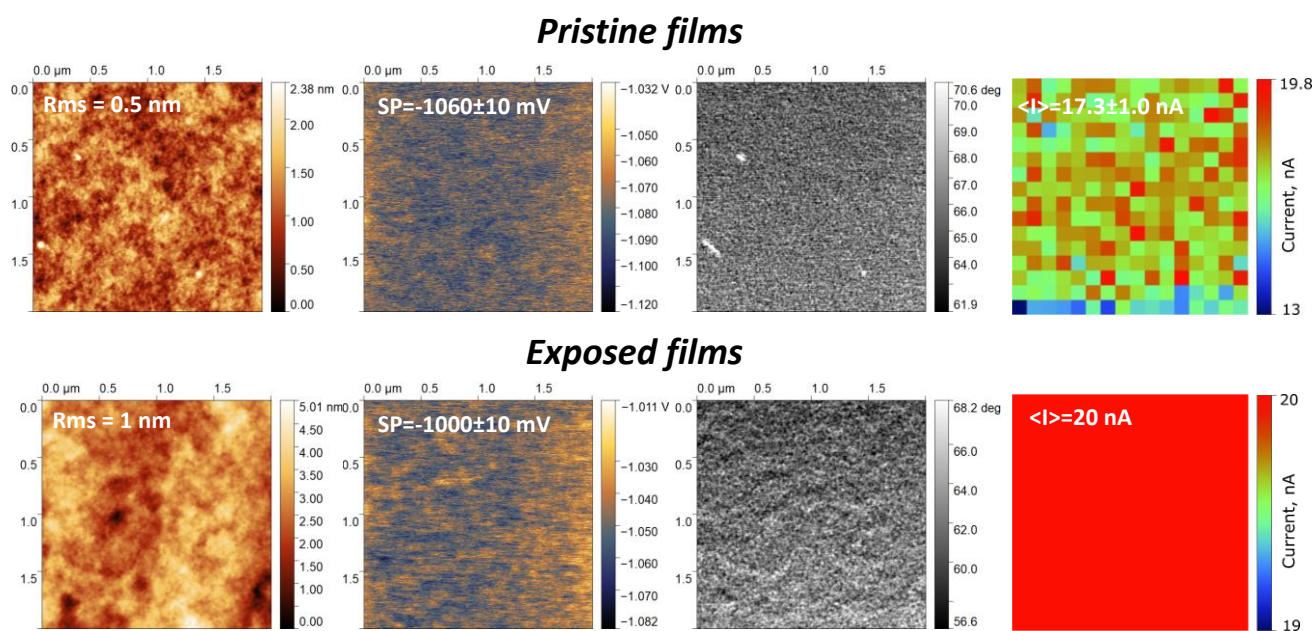

**Figure S5.** Left to right: AFM topography, surface potential, phase and current mapping images of [60]PCBM films before (top) and after (bottom) exposure to gamma rays (6500 Gy).

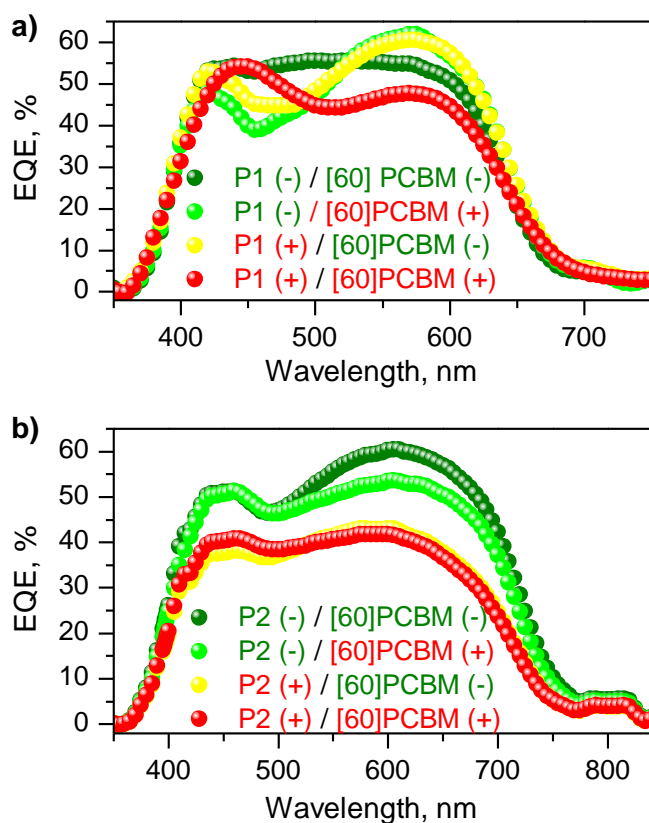

**Figure S6.** EQE spectra of organic solar cells based on the blends of non-exposed (-) and exposed to 200Gy (+) materials: **P1**/[60]PCBM (a) and **P2**/[60]PCBM (b).



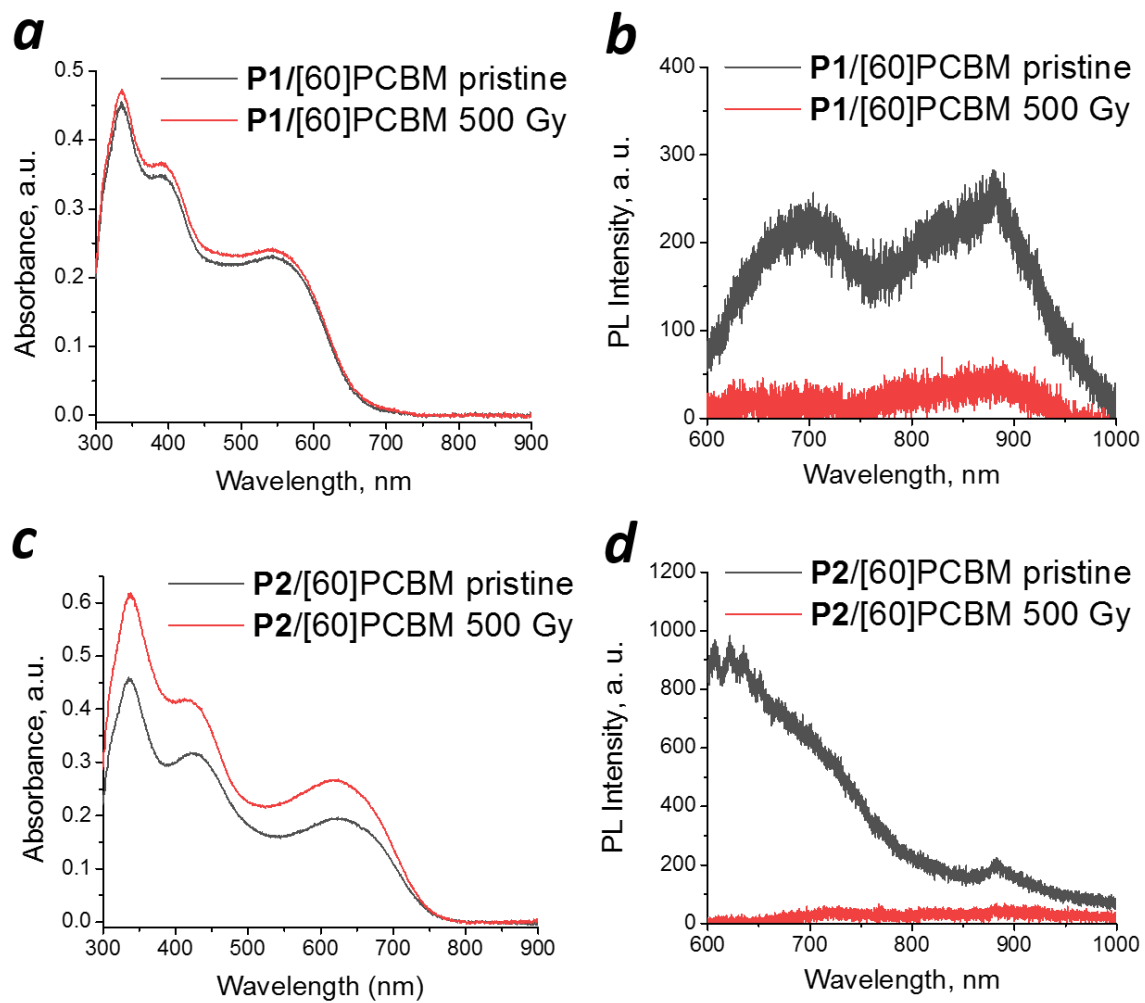

**Figure S7** Evolution of the absorption (a, c) and PL (b, d) spectra of the **P1**/[60]PCBM (a-b) and **P2**/[60]PCBM (c-d) blend films

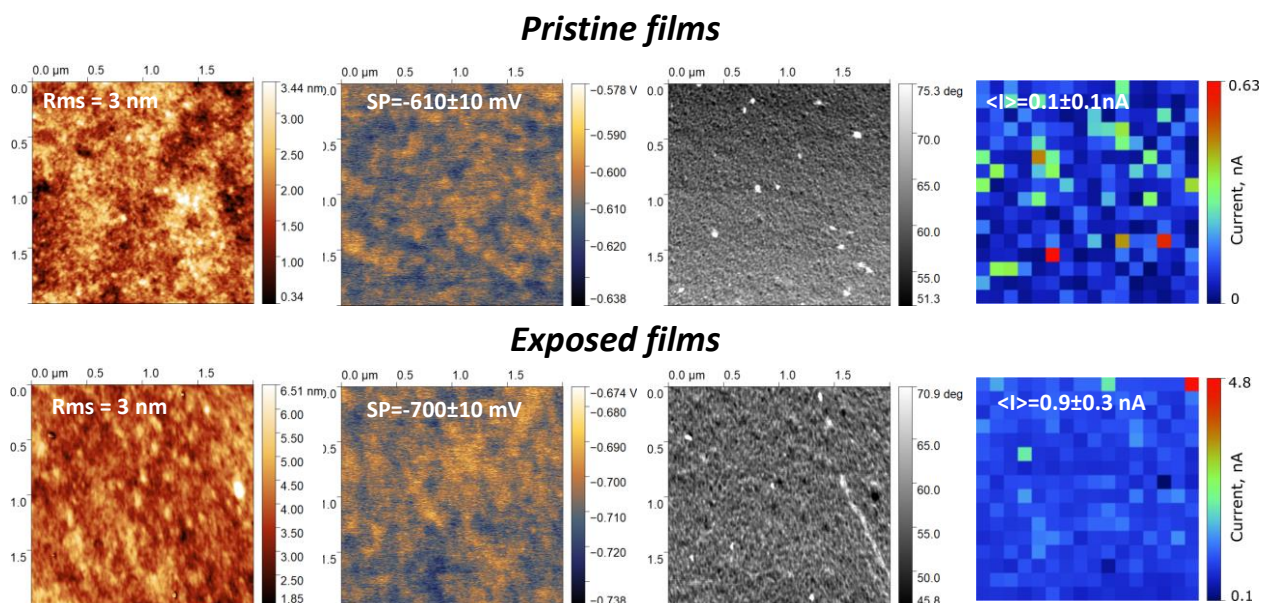

**Figure S8.** Left to right: AFM topography, surface potential, phase and current mapping images of **P1**/[60]PCBM films before (top) and after (bottom) exposure to gamma rays (6500 Gy)

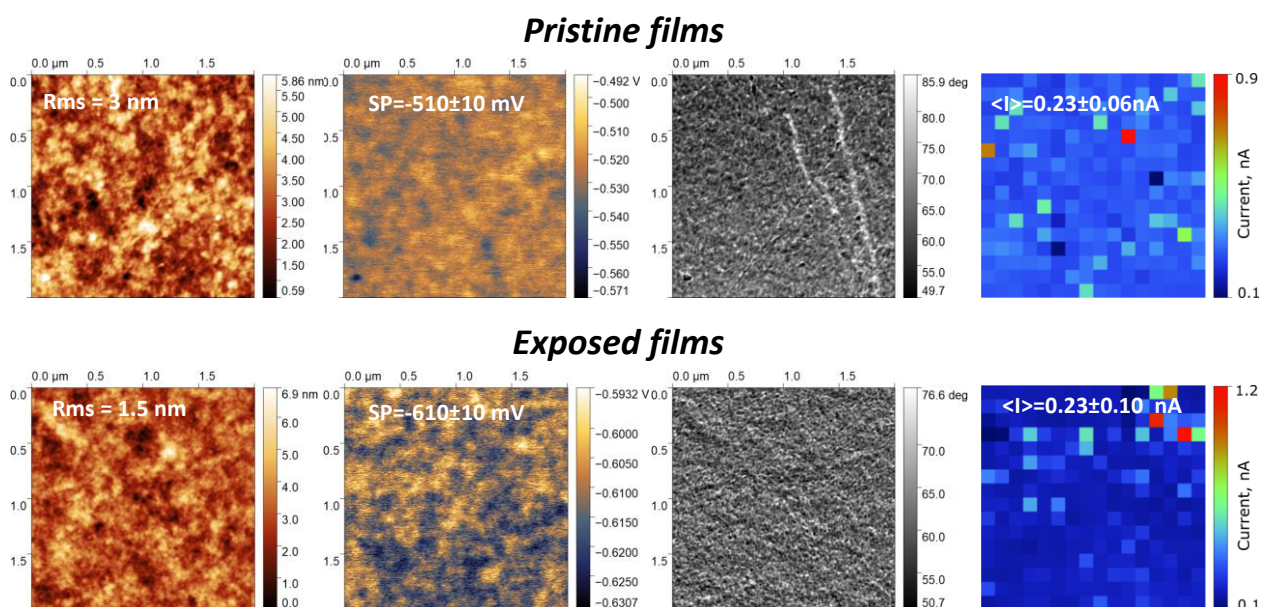

**Figure S9.** Left to right: AFM topography, surface potential, phase and current mapping images of **P2**/[60]PCBM films before (top) and after (bottom) exposure to gamma rays (500 Gy)



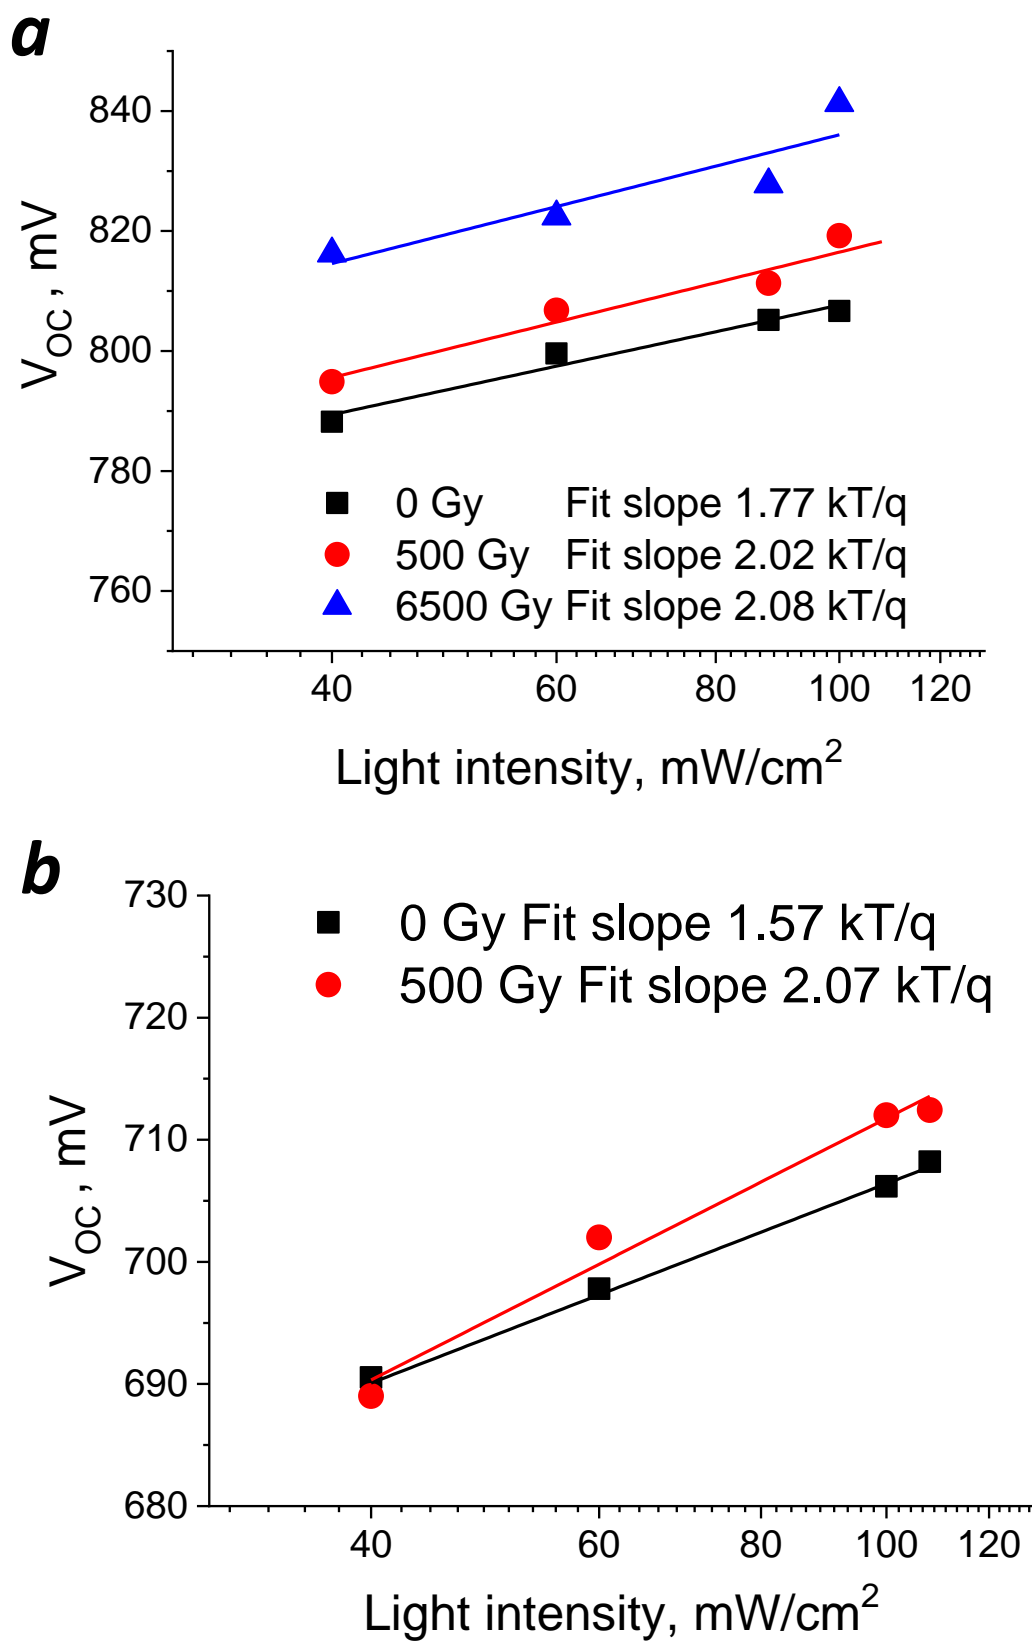

**Figure S10.**  $V_{OC}$  vs. light intensity dependences for organic solar cells based on the pristine and exposed to gamma rays **P1**/[60]PCBM (a) and **P2**/[60]PCBM (b) blend films

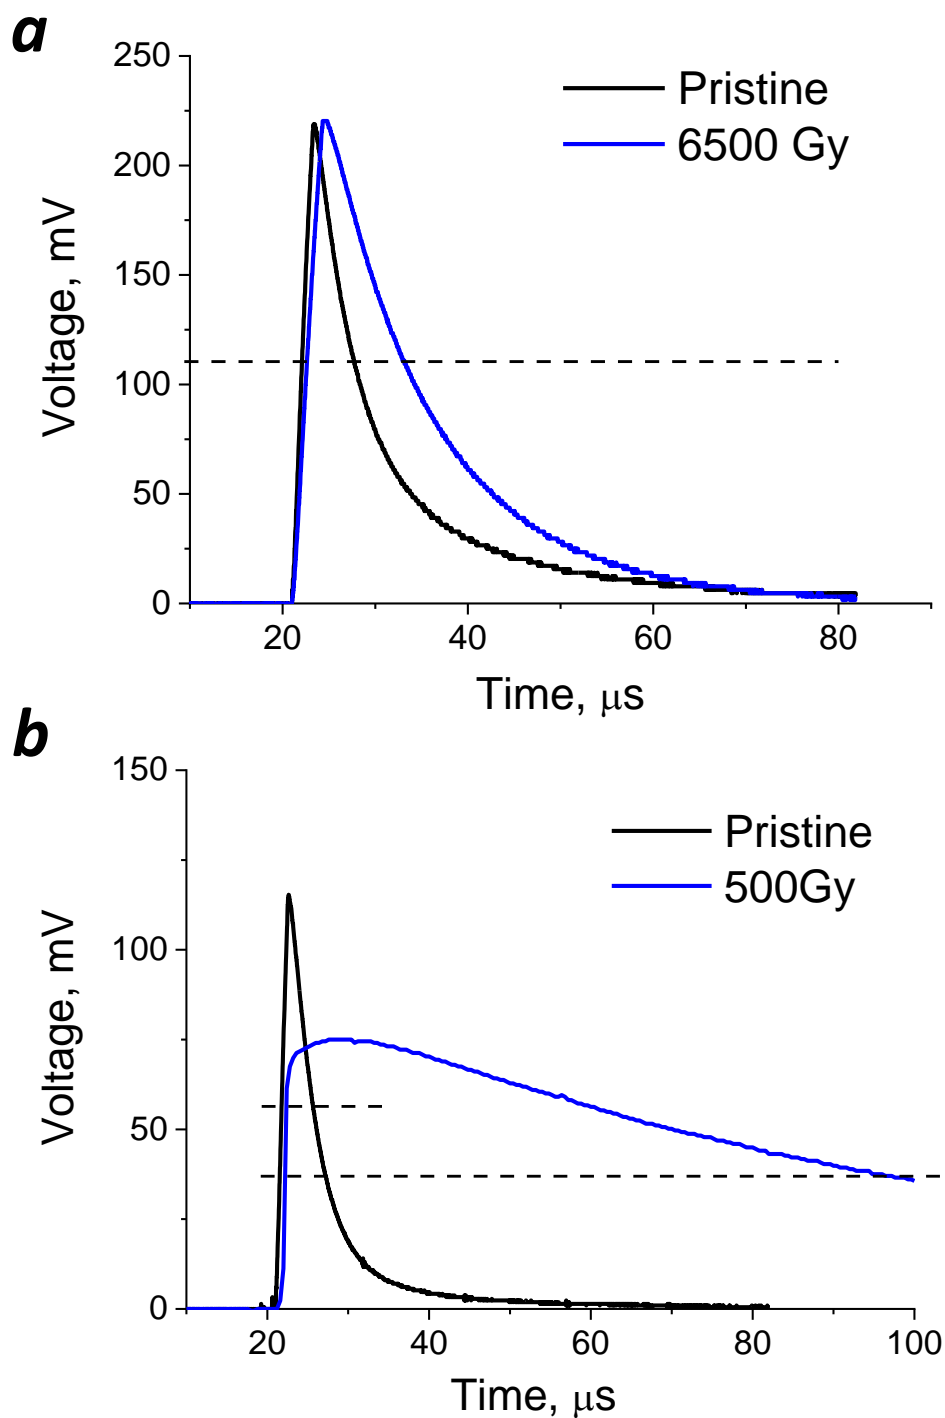

**Figure S11.** Transient photovoltage (TPV) profiles for organic solar cells based on the pristine and exposed to gamma rays **P1**/[60]PCBM (a) and **P2**/[60]PCBM (b) blend films

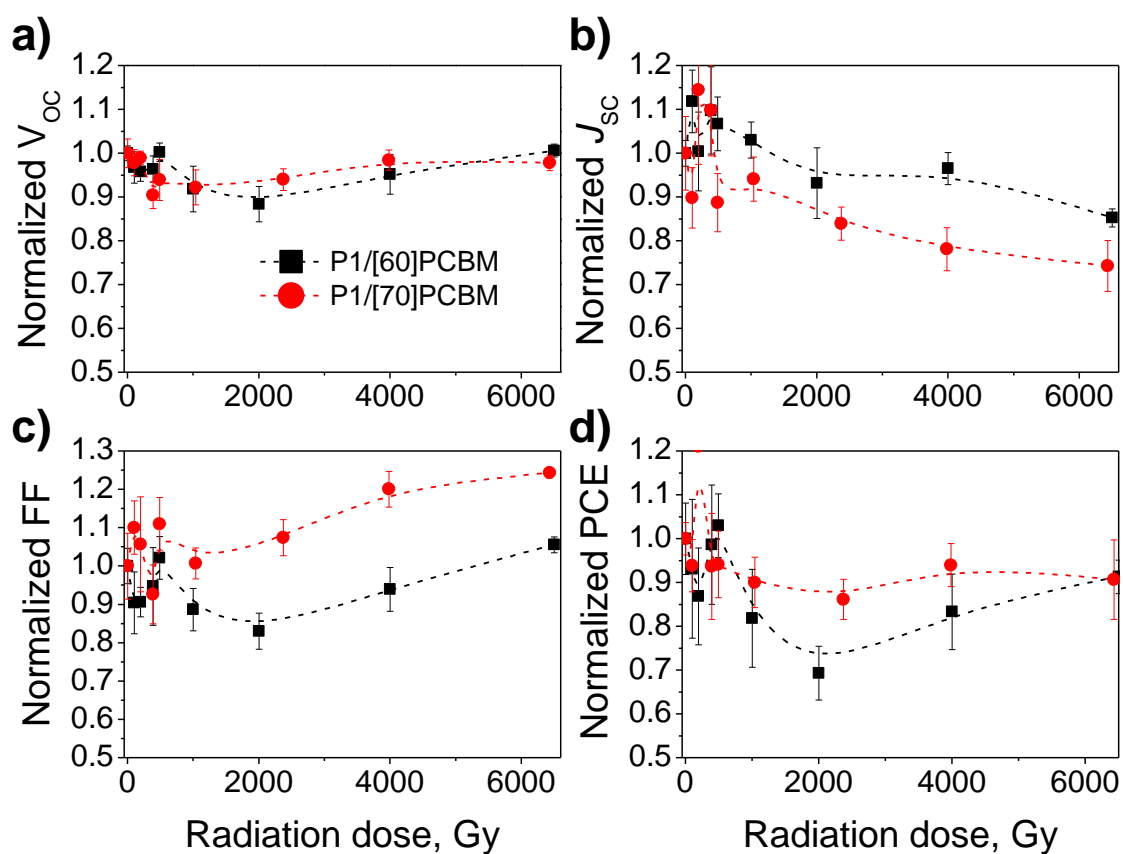

**Figure S12.** Normalized characteristics of the solar cells based on **P1**/[60]PCBM (black) and **P1**/[70]PCBM (red) plotted as functions of the radiation dose: open circuit voltage  $V_{OC}$  (a), short circuit current density  $J_{SC}$  (b), fill factor FF (c) and power conversion efficiency PCE (d)

**Table S1.** Characteristics of organic solar cells before and after exposure of the samples to different doses of gamma rays

| Dose,<br>Gy          | V <sub>oc</sub> , mV | J <sub>sc</sub> , mA/cm <sup>2</sup> | FF, % | PCE, %   |
|----------------------|----------------------|--------------------------------------|-------|----------|
| <b>P1/[60]PCBM*</b>  |                      |                                      |       |          |
| 0                    | 829 ±27              | 9.7 ±0.8                             | 43 ±4 | 3.4 ±0.1 |
| 100                  | 811 ±25              | 8.7 ±0.7                             | 47 ±3 | 3.2 ±0.2 |
| 200                  | 820 ±13              | 11.1 ±1.6                            | 45 ±5 | 4.1 ±0.2 |
| 350                  | 750 ±25              | 10.7 ±1.0                            | 39 ±3 | 3.2 ±0.4 |
| 500                  | 779 ±39              | 8.6 ±0.6                             | 47 ±3 | 3.2 ±0.3 |
| 2050                 | 765 ±33              | 9.1 ±0.5                             | 43 ±2 | 3.1 ±0.2 |
| 4060                 | 779 ±20              | 8.2 ±0.4                             | 46 ±2 | 2.9 ±0.2 |
| 6350                 | 816 ±19              | 7.6 ±0.5                             | 51 ±2 | 3.2 ±0.2 |
| <b>P1/[70]PCBM*</b>  |                      |                                      |       |          |
| 0                    | 838 ±14              | 12.1 ±0.4                            | 50 ±2 | 5.1 ±0.4 |
| 100                  | 811 ±30              | 13.5 ±0.9                            | 45 ±4 | 4.8 ±0.8 |
| 200                  | 803 ±18              | 12.1 ±1.1                            | 45 ±2 | 4.5 ±0.6 |
| 350                  | 808 ±25              | 13.2 ±1.2                            | 48 ±5 | 5.1 ±0.7 |
| 500                  | 841 ±18              | 12.9 ±0.7                            | 51 ±3 | 5.3 ±0.4 |
| 2050                 | 770 ±44              | 12.4 ±0.5                            | 45 ±3 | 4.2 ±0.6 |
| 4060                 | 741 ±34              | 11.3 ±1.0                            | 42 ±2 | 3.6 ±0.3 |
| 6350                 | 798 ±38              | 11.7 ±0.4                            | 47 ±3 | 4.3 ±0.4 |
| <b>P2/[60]PCBM**</b> |                      |                                      |       |          |
| 0                    | 702 ±14              | 12.6 ±0.5                            | 53 ±4 | 4.6 ±0.5 |
| 99                   | 690 ±25              | 13.6 ±0.9                            | 48 ±5 | 4.4 ±0.6 |
| 195                  | 690 ±18              | 11.5 ±0.4                            | 49 ±4 | 4.0 ±0.4 |
| 390                  | 679 ±12              | 12.4 ±0.5                            | 48 ±1 | 4.0 ±0.3 |
| 490                  | 707 ±21              | 11.6 ±0.8                            | 49 ±3 | 3.7 ±0.4 |

\* - the active layer thickness was 90±5 nm.

\*\* - the active layer thickness was 100±5 nm.
